# Supplementary material
Source: Springer Nature journal article supplement (https://www.springermedizin.de/resource/supplementary/12884_2012_627_MOESM1_ESM.pdf/9458166)
Supplement: MOESM1 [file 9458166]

1 Appendix S1: Midwives Data Collection

2

| <b>NSW MIDWIVES DATA COLLECTION</b>                                                                         |                                                       |                                                                                                         |                                                                      |
|-------------------------------------------------------------------------------------------------------------|-------------------------------------------------------|---------------------------------------------------------------------------------------------------------|----------------------------------------------------------------------|
| Mother Unit Record No. <input style="width: 100%;" type="text"/>                                            | Hospital <input style="width: 100%;" type="text"/>    |                                                                                                         | Code <input style="width: 100%;" type="text"/>                       |
| First Name <input style="width: 100%;" type="text"/>                                                        | Family Name <input style="width: 100%;" type="text"/> |                                                                                                         |                                                                      |
| Address <input style="width: 100%;" type="text"/>                                                           |                                                       | Postcode <input style="width: 100%;" type="text"/>                                                      |                                                                      |
| Mother's birth date <input style="width: 100%;" type="text"/>                                               | <b>LABOUR AND DELIVERY</b>                            |                                                                                                         | <b>BABY</b>                                                          |
| Country of birth <input type="checkbox"/> Australia <input type="checkbox"/> Other <input type="checkbox"/> | <i>If labour induced, main indication:</i>            |                                                                                                         | Place of birth                                                       |
| If other, specify <input style="width: 100%;" type="text"/>                                                 | Diabetes <input type="checkbox"/> 1                   |                                                                                                         | Hospital theatre/delivery suite <input type="checkbox"/> 1           |
| Indigenous status: <input type="checkbox"/> Aboriginal <input type="checkbox"/> 1                           | Hypertensive disease <input type="checkbox"/> 2       |                                                                                                         | Birth centre <input type="checkbox"/> 2                              |
| <input type="checkbox"/> Torres Strait Islander <input type="checkbox"/> 2                                  | Fetal distress <input type="checkbox"/> 3             |                                                                                                         | Planned birth centre/delivery suite birth <input type="checkbox"/> 3 |
| <input type="checkbox"/> Aboriginal and Torres Strait Islander <input type="checkbox"/> 3                   | Fetal death <input type="checkbox"/> 4                |                                                                                                         | Planned homebirth <input type="checkbox"/> 4                         |
| <input type="checkbox"/> None of the above <input type="checkbox"/> 4                                       | Chorioamnionitis <input type="checkbox"/> 5           |                                                                                                         | Planned homebirth/hospital admission <input type="checkbox"/> 6      |
| <b>PREVIOUS PREGNANCIES</b>                                                                                 |                                                       | Blood group isommunisation <input type="checkbox"/> 6                                                   |                                                                      |
| Previous pregnancy greater than 20 weeks? Yes <input type="checkbox"/> 1 No <input type="checkbox"/> 0      |                                                       | Prelabour rupture of membranes <input type="checkbox"/> 7                                               |                                                                      |
| If no, go to next section.                                                                                  |                                                       | Prolonged pregnancy (41+ weeks) <input type="checkbox"/> 8                                              |                                                                      |
| If yes:                                                                                                     |                                                       | Suspected Intrauterine growth restriction <input type="checkbox"/> 9                                    |                                                                      |
| Specify the number of previous pregnancies > 20 weeks <input style="width: 100%;" type="text"/>             |                                                       | Other <input type="checkbox"/> 10                                                                       |                                                                      |
| Was the last birth by caesarean? Yes <input type="checkbox"/> 1 No <input type="checkbox"/> 0               |                                                       | Pain relief/ anaesthetics (tick 1 or more)                                                              |                                                                      |
| Total number of previous caesarean sections? <input style="width: 100%;" type="text"/>                      |                                                       | None <input type="checkbox"/>                                                                           |                                                                      |
| <b>THIS PREGNANCY</b>                                                                                       |                                                       | Pudendal <input type="checkbox"/>                                                                       |                                                                      |
| Date of LMP <input style="width: 100%;" type="text"/>                                                       |                                                       | Nitrous oxide <input type="checkbox"/>                                                                  |                                                                      |
| Prenatal diagnosis (< 20 weeks gestation) <input type="checkbox"/> CVS <input type="checkbox"/>             |                                                       | Spinal <input type="checkbox"/>                                                                         |                                                                      |
| <input type="checkbox"/> Amniocentesis <input type="checkbox"/>                                             |                                                       | IM narcotics <input type="checkbox"/>                                                                   |                                                                      |
| Antenatal care                                                                                              |                                                       | Local to perineum <input type="checkbox"/>                                                              |                                                                      |
| Duration of pregnancy at first visit (weeks) <input style="width: 100%;" type="text"/>                      |                                                       | Epidural/caudal <input type="checkbox"/>                                                                |                                                                      |
| <input type="checkbox"/> Not booked <input type="checkbox"/>                                                |                                                       | Other <input type="checkbox"/>                                                                          |                                                                      |
| Medical conditions                                                                                          |                                                       | Presentation at birth                                                                                   |                                                                      |
| <input type="checkbox"/> Diabetes mellitus <input type="checkbox"/>                                         |                                                       | Vertex <input type="checkbox"/> 1                                                                       |                                                                      |
| <input type="checkbox"/> Gestational diabetes <input type="checkbox"/>                                      |                                                       | Face <input type="checkbox"/> 3                                                                         |                                                                      |
| <input type="checkbox"/> Chronic hypertension <input type="checkbox"/>                                      |                                                       | Brow <input type="checkbox"/> 4                                                                         |                                                                      |
| <input type="checkbox"/> Pre-eclampsia <input type="checkbox"/>                                             |                                                       | Other <input type="checkbox"/> 5                                                                        |                                                                      |
| Smoking                                                                                                     |                                                       | Type of delivery                                                                                        |                                                                      |
| Did the mother smoke at all during pregnancy? Yes <input type="checkbox"/> 1 No <input type="checkbox"/> 0  |                                                       | Normal vaginal <input type="checkbox"/> 1                                                               |                                                                      |
| If yes, how many cigarettes each day on average in the second half of pregnancy?                            |                                                       | Vacuum extr. <input type="checkbox"/> 3                                                                 |                                                                      |
| None <input type="checkbox"/> 1 > 10 per day <input type="checkbox"/> 2                                     |                                                       | Forceps <input type="checkbox"/> 2                                                                      |                                                                      |
| ≤ 10 per day <input type="checkbox"/> 3 Unknown <input type="checkbox"/> 4                                  |                                                       | Vaginal breech <input type="checkbox"/> 4                                                               |                                                                      |
| <b>LABOUR AND DELIVERY</b>                                                                                  |                                                       | Caesarean section <input type="checkbox"/> 5                                                            |                                                                      |
| Onset of labour                                                                                             |                                                       | <i>If caesarean section, main indication:</i>                                                           |                                                                      |
| Spontaneous <input type="checkbox"/> 1 Induced <input type="checkbox"/> 2                                   |                                                       | Failure to progress                                                                                     |                                                                      |
| No labour <input type="checkbox"/> 3                                                                        |                                                       | - Cx dilatation unknown <input type="checkbox"/> 1                                                      |                                                                      |
| <i>If labour augmented/ induced (tick 1 or more):</i>                                                       |                                                       | - Cx 3cm dilated or less <input type="checkbox"/> 2                                                     |                                                                      |
| Oxytocins <input type="checkbox"/>                                                                          |                                                       | - Cx dilated more than 3 cm <input type="checkbox"/> 3                                                  |                                                                      |
| Prostaglandins <input type="checkbox"/>                                                                     |                                                       | Fetal distress <input type="checkbox"/> 4                                                               |                                                                      |
| ARM <input type="checkbox"/>                                                                                |                                                       | Other <input type="checkbox"/> 5                                                                        |                                                                      |
| Other <input type="checkbox"/>                                                                              |                                                       | Surgical repair of the vagina or perineum? Yes <input type="checkbox"/> 1 No <input type="checkbox"/> 0 |                                                                      |
| <b>DISCHARGE STATUS - MOTHER AND BABY</b>                                                                   |                                                       | Perineal status                                                                                         |                                                                      |
| Mother                                                                                                      |                                                       | Intact <input type="checkbox"/> 1                                                                       |                                                                      |
| Discharged <input type="checkbox"/> 1                                                                       |                                                       | 1st deg. tear/graze <input type="checkbox"/> 2                                                          |                                                                      |
| Transferred <input type="checkbox"/> 2                                                                      |                                                       | 2nd deg. tear <input type="checkbox"/> 3                                                                |                                                                      |
| Died <input type="checkbox"/> 3                                                                             |                                                       | 3rd deg. tear <input type="checkbox"/> 4                                                                |                                                                      |
| Baby                                                                                                        |                                                       | 4th deg. tear <input type="checkbox"/> 5                                                                |                                                                      |
| Discharged <input type="checkbox"/> 1                                                                       |                                                       | Episiotomy <input type="checkbox"/> 6                                                                   |                                                                      |
| Transferred <input type="checkbox"/> 2                                                                      |                                                       | Both tear and episiotomy <input type="checkbox"/> 7                                                     |                                                                      |
| Stillbirth <input type="checkbox"/> 3                                                                       |                                                       | Other <input type="checkbox"/> 8                                                                        |                                                                      |
| Neonatal death <input type="checkbox"/> 4                                                                   |                                                       | Surgical repair of the vagina or perineum? Yes <input type="checkbox"/> 1 No <input type="checkbox"/> 0 |                                                                      |
| Transferred and died <input type="checkbox"/> 5                                                             |                                                       | Baby's date of discharge or transfer <input style="width: 100%;" type="text"/>                          |                                                                      |
| Hospital transferred to: <input style="width: 100%;" type="text"/>                                          |                                                       | Hospital transferred to: <input style="width: 100%;" type="text"/>                                      |                                                                      |
| If baby died, date of death <input style="width: 100%;" type="text"/>                                       |                                                       | If baby died, date of death <input style="width: 100%;" type="text"/>                                   |                                                                      |
| Signature of midwife at discharge <input style="width: 100%;" type="text"/>                                 |                                                       | Signature of midwife at discharge <input style="width: 100%;" type="text"/>                             |                                                                      |

3
